# Supplementary material for: Comprehensive profiling and quantitation of oncogenic mutations in non small-cell lung carcinoma using single molecule amplification and re-sequencing technology
Source: PubMed Central journal article supplement (PMC5226597; doi:10.18632/oncotarget.10464), 2016-07-07
Supplement: oncotarget-07-50477-s001.pdf [file oncotarget-07-50477-s001.pdf]

# Comprehensive profiling and quantitation of oncogenic mutations in non small-cell lung carcinoma using single molecule amplification and re-sequencing technology

## SUPPLEMENTARY FIGURE AND TABLES

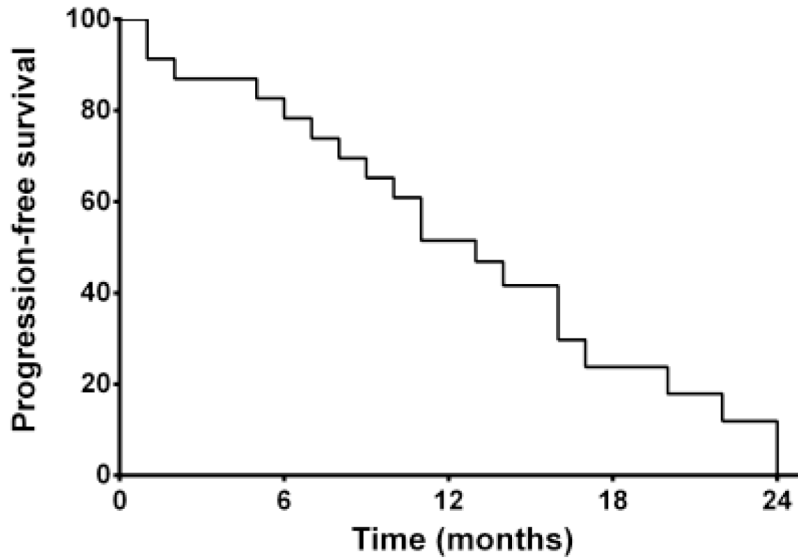

Supplementary Figure S1: Progression-free survival in 23 patients treated with TKIs.

Supplementary Table S1: Gene exons and hotspot mutations surveyed by the multiplex SMART assay

| Gene         | Exon | Hotspot mutations                                                                                                                                                                                                                                                                                         | Number of mutations | Inverse primer pairs |
|--------------|------|-----------------------------------------------------------------------------------------------------------------------------------------------------------------------------------------------------------------------------------------------------------------------------------------------------------|---------------------|----------------------|
| EGFR         | 18   | G719S, G719C, G719A                                                                                                                                                                                                                                                                                       | 3                   | 2                    |
|              | 19   | E746_A750del (COSM6223), E746_A750del (COSM6225), L747_T751del (COSM6254), L747_T751del (COSM12369), E746_T751>I, E746_T751del, E746_T751>A, E746_S752>A, E746_S752>V, E746_S752>D, L747_A750>P, L747_T751>Q, L747_E749del, L747_S752del, L747_A750>P, L747_A753>Q, L747_T751>P, L747_P753>S, L747_T751>S | 19                  | 2                    |
|              | 20   | S768I, T790M, V769_D770insASV, D770_N771insG, H773_V774insH                                                                                                                                                                                                                                               | 5                   | 2                    |
|              | 21   | L858R, L861Q                                                                                                                                                                                                                                                                                              | 2                   | 2                    |
| KRAS         | 2    | G12S, G12C, G12R, G12D, G12A, G12V, G13D                                                                                                                                                                                                                                                                  | 7                   | 2                    |
|              | 3    | Q61K, Q61E, Q61R, Q61L, Q61P, Q61H (COSM554), Q61H (COSM555)                                                                                                                                                                                                                                              | 7                   | 2                    |
|              | 4    | A146P, A146V, A146T                                                                                                                                                                                                                                                                                       | 3                   | 2                    |
| BRAF         | 15   | V600E, V600D, V600K, V600R                                                                                                                                                                                                                                                                                | 4                   | 2                    |
| ALK          | 20   | Intron 19 – EML4 fusions, Exon 20 – EML4 fusions                                                                                                                                                                                                                                                          | 1                   | 26                   |
|              | 22   | T1151Tins, L1152R, C1156Y, I1171N, F1174L                                                                                                                                                                                                                                                                 | 5                   | 2                    |
|              | 24   | L1196M, G1202R, D1203N, S1206Y                                                                                                                                                                                                                                                                            | 4                   | 2                    |
|              | 25   | G1269A                                                                                                                                                                                                                                                                                                    | 1                   | 2                    |
| TP53         | 4    | R175C, R175H                                                                                                                                                                                                                                                                                              | 2                   | 2                    |
|              | 6    | R248W, R248Q                                                                                                                                                                                                                                                                                              | 2                   | 2                    |
|              | 7    | R273C, R273H                                                                                                                                                                                                                                                                                              | 2                   | 2                    |
| <b>Total</b> |      |                                                                                                                                                                                                                                                                                                           | <b>67</b>           | <b>54</b>            |

Supplementary Table S2: Oncogenic mutation profiles versus pathology and stage of NSCLC.

See Supplementary File 1

Supplementary Table S3: Tumour pathology and stage of NSCLC in mutation negative patients.

See Supplementary File 2

Supplementary Table S4: Oncogenic mutation profiles in matching tumour and non-tumour tissue

| Sample number | Mutation gene | Mutation type                                         | SMART assay result       |                |                          |                |
|---------------|---------------|-------------------------------------------------------|--------------------------|----------------|--------------------------|----------------|
|               |               |                                                       | Tumour specimen          |                | Non tumour specimen      |                |
|               |               |                                                       | Mutation/total templates | Mutation ratio | Mutation/total templates | Mutation ratio |
| CBR017        | EGFR          | E746_A750del                                          | 446/2407                 | 18.53%         | 0/3545                   | 0              |
| CBR018        | EGFR          | E746_A750del                                          | 26479/27332              | 96.88%         | 0/2749                   | 0              |
| CBR019        | EGFR          | E19 del exon19:c.2238_2252 del:p.746_751del           | 635/1549                 | 40.99%         | 0/3151                   | 0              |
| CBR021        | EGFR          | L858R                                                 | 234/1783                 | 13.12%         | 0/3490                   | 0              |
| CBR024        | EGFR          | L858R                                                 | 87/1344                  | 6.47%          | 0/3341                   | 0              |
| CBR035        | EGFR          | E746_A750del                                          | 446/1604                 | 27.81%         | 0/3120                   | 0              |
| CBR036        | EGFR          | E746_A750del                                          | 99/1391                  | 7.12%          | 0/2807                   | 0              |
| CBR040        | EGFR          | L858R                                                 | 1092/2626                | 41.58%         | 0/2280                   | 0              |
| CBR041        | EGFR          | L858R                                                 | 393/2297                 | 17.11%         | 0/2639                   | 0              |
| CBR046        | ALK           | fusion                                                | 5/767                    | 0.65%          | Not detected             | -              |
| CBR048        | EGFR          | L858R                                                 | 50/1574                  | 3.18%          | 0/3068                   | 0              |
| CBR057        | EGFR          | L858R                                                 | 155/1634                 | 9.49%          | 0/3420                   | 0              |
|               | TP53          | R248W                                                 | Not detected             | -              | 63/3124                  | 2.02%          |
| CBR060        | EGFR          | E746_A750del                                          | 305/1658                 | 18.40%         | 0/3108                   | 0              |
|               | EGFR          | E19del exon19:c.2236_2244 del:p.746_748del            | Not detected             | -              | 8/3110                   | 0.26%          |
| CBR071        | EGFR          | L858R                                                 | 173/1931                 | 8.96%          | 0/3423                   | 0              |
| CBR094        | EGFR          | E19 del exon19:c.2236_2244 del:p.746_748del           | 386/1975                 | 19.54%         | 0/2439                   | 0              |
| CBR100        | EGFR          | L858R                                                 | 197/872                  | 22.59%         | 0/3643                   | 0              |
| CBR115        | EGFR          | L858R                                                 | 1559/3177                | 49.07%         | 0/3787                   | 0              |
|               | EGFR          | E20ins<br>c.2315_2316insCCACGT:<br>p.P772delinsPHV    | Not detected             | -              | 2/3080                   | 0.06%          |
| CBR121        | ALK           | fusion                                                | 172/628                  | 27.39%         | Not detected             | -              |
| CBR124        | EGFR          | E746_A750del                                          | 418/1358                 | 30.78%         | 0/3487                   | 0              |
| CBR127        | ALK           | fusion                                                | 161/1076                 | 14.96%         | Not detected             | -              |
| CBR128        | EGFR          | L858R                                                 | 449/1384                 | 32.44%         | 0/2769                   | 0              |
| CBR129        | EGFR          | E746_A750del                                          | 202/1112                 | 18.17%         | 0/2958                   | 0              |
| CBR134        | EGFR          | L858R                                                 | 293/1094                 | 26.78%         | 0/4276                   | 0              |
| CBR135        | EGFR          | L858R                                                 | 315/1554                 | 20.27%         | 0/3242                   | 0              |
|               | EGFR          | E20ins<br>exon20:c.2320_2321insT<br>GC:p.V774delinsVL | Not detected             | -              | 1/2249                   | 0.04%          |
| CBR136        | EGFR          | E19 del exon19:c.2238_2249 del:p.746_750del           | 259/1277                 | 20.28%         | 0/2972                   | 0              |

Supplementary Table S5: Summary of discordant EGFR mutation detection by ARMS-PCR and SMART assay

| Sample number | ARMS-PCR assay result | SMART assay result |                          |                | Sanger sequencing confirmation                            |
|---------------|-----------------------|--------------------|--------------------------|----------------|-----------------------------------------------------------|
|               |                       | Mutation site      | Mutation/total templates | Mutation ratio |                                                           |
| CBR053        | E19 del positive      | E19 del            | 0/2014                   | 0%             | Normal exon 19 sequence (Exon 19 del negative)            |
| CBR070        | E19 del positive      | E19 del            | 65/829                   | 7.84%          | c.2214_2215, insAAAATTCCCGTCGCTATC (Exon 19 del negative) |
| CBR112        | E19 del positive      | E19 del            | 0/2359                   | 0%             | c.2235_2249del15 (Exon 19 del positive)                   |
| CBR008        | negative              | E20 ins            | 1/979                    | 0.10%          | Not confirmed                                             |
| CBR025        | negative              | E19 del            | 2/1653                   | 0.12%          | Not confirmed                                             |
| CBR098        | negative              | T790M              | 10/1202                  | 0.83%          | Not confirmed                                             |
| CBR132        | negative              | T790M              | 12/706                   | 1.70%          | Not confirmed                                             |
| CBR187        | negative              | L858R              | 29/927                   | 3.13%          | Not confirmed                                             |

Table S6: Progression-free survival in patients treated with TKIs

| Patient number | EGFR mutation                        | Mutation ratio | T790M mutation status | PFS   |
|----------------|--------------------------------------|----------------|-----------------------|-------|
| CBR019         | E19 del: c.2238_2252del:p.746_751del | 40.99%         | -                     | 13.00 |
| CBR027         | E19 del: L747_P753>S                 | 70.81%         | -                     | 22.00 |
| CBR039         | E19 del: L747_P753>S                 | 8.22%          | -                     | 14.00 |
| CBR052         | E19 del: L747_P753>S                 | 59.04%         | +                     | 17.00 |
| CBR075         | E19 del: E746_A750del                | 64.06%         | -                     | 10.00 |
| CBR081         | E19 del: c.2250_2251del:p.750_751del | 29.20%         | -                     | 13.00 |
|                | E19 del: c.2237_2246del:p.746_749del | 29.45%         |                       |       |
| CBR107         | E19 del: c.2238_2252del:p.746_751del | 36.85%         | -                     | 16.00 |
| CBR118         | E19 del: E746_A750del                | 4.75%          | -                     | 16.00 |
| CBR139         | E19 del: E746_A750del                | 28.87%         | -                     | 14.00 |
| CBR066         | E19 del: E746_A750del                | 1.09%          | -                     | 1.00  |
| CBR014         | L858R                                | 51.94%         | -                     | 2.00  |
| CBR021         | L858R                                | 13.12%         | -                     | 8.00  |
| CBR048         | L858R                                | 3.18%          | -                     | 22.00 |
| CBR061         | L858R                                | 46.03%         | -                     | 1.00  |
| CBR077         | L858R                                | 21.27%         | -                     | 9.00  |
| CBR085         | L858R                                | 2.36%          | -                     | 6.00  |
| CBR091         | L858R                                | 38.51%         | -                     | 7.00  |
| CBR093         | L858R                                | 43.39%         | -                     | 24.00 |
| CBR105         | L858R                                | 30.43%         | -                     | 5.00  |
| CBR125         | L858R                                | 29.67%         | -                     | 11.00 |
| CBR126         | L858R                                | 17.05%         | -                     | 11.00 |
| CBR138         | L858R                                | 8.77%          | -                     | 10.00 |
| CBR079         | L861Q                                | 44.54%         | -                     | 20.00 |

PFS = Progression-free survival.
